# Supplementary material
Source: HighWire-hosted journal article supplement (https://bmjopen.bmj.com/content/12/4/e052800)
Supplement: inline-supplementary-material-1 [file inline-supplementary-material-1.pdf]

## Supplementary Appendix 1

### Eligibility Criteria

| PICO         | Inclusion Criteria                                                                                                                                                                                                                                                                                                                                                                                                                | Exclusion Criteria                                                                                                                                                                                                                                                                                                                                                           |
|--------------|-----------------------------------------------------------------------------------------------------------------------------------------------------------------------------------------------------------------------------------------------------------------------------------------------------------------------------------------------------------------------------------------------------------------------------------|------------------------------------------------------------------------------------------------------------------------------------------------------------------------------------------------------------------------------------------------------------------------------------------------------------------------------------------------------------------------------|
| Population   | <ul style="list-style-type: none"> <li>• Incarcerated population which are individuals in detention in prisons who are serving sentences for more than a year with no restrictions regarding age, gender or ethnicity</li> </ul>                                                                                                                                                                                                  | <ul style="list-style-type: none"> <li>• Arrested individuals who stay in police custody</li> <li>• Prisoners of War</li> <li>• Persons from concentration camps</li> <li>• Immigration detainees</li> <li>• Prisoners in psychiatric units</li> <li>• Those awaiting trial, sentencing, or transfer to prison,</li> <li>• Local jails</li> <li>• Home detentions</li> </ul> |
| Intervention | <ul style="list-style-type: none"> <li>• Any form of health-related quality of life measurement including but not limited to:               <ul style="list-style-type: none"> <li>• Physical functioning</li> <li>• SF-6D</li> <li>• SF-36</li> <li>• EQ-5D</li> <li>• 15D</li> <li>• QWB</li> <li>• QWB-SA</li> <li>• AQoL-4D</li> <li>• AQoL-6D</li> </ul> </li> <li>• Any form of health state utility measurement</li> </ul> |                                                                                                                                                                                                                                                                                                                                                                              |

|            |                                                                                                                                                                                                                                                                                   |                                                                                |
|------------|-----------------------------------------------------------------------------------------------------------------------------------------------------------------------------------------------------------------------------------------------------------------------------------|--------------------------------------------------------------------------------|
| Comparison | No comparison group                                                                                                                                                                                                                                                               |                                                                                |
| Outcomes   | <ul style="list-style-type: none"><li>• Health-related quality of life value</li><li>• Health state utility score<ul style="list-style-type: none"><li>• Health utility index</li></ul></li><li>• Quality-adjusted life year</li><li>• Quality-adjusted life expectancy</li></ul> | <ul style="list-style-type: none"><li>• Exclude non-English articles</li></ul> |
