# Supplementary material
Source: HighWire-hosted journal article supplement (https://bmjopen.bmj.com/content/12/4/e052800)
Supplement: inline-supplementary-material-3 [file inline-supplementary-material-3.pdf]

## Supplementary Appendix 3

| Study identifiers                                                                                                                                                  | Study participant characteristics                                                                                                                                                                                                                                            | Method of elicitation of HRQoL values and HSUVs                                                                                                                                           | Description of results and findings of the study:                                                                                                                                                                                                                                                                     |
|--------------------------------------------------------------------------------------------------------------------------------------------------------------------|------------------------------------------------------------------------------------------------------------------------------------------------------------------------------------------------------------------------------------------------------------------------------|-------------------------------------------------------------------------------------------------------------------------------------------------------------------------------------------|-----------------------------------------------------------------------------------------------------------------------------------------------------------------------------------------------------------------------------------------------------------------------------------------------------------------------|
| ID:<br>Author:<br>Article title:<br>Year:<br>Country of respondents:<br>Conflict of interest:<br>Funding source:<br>Study design:<br>Exclusions:<br>Study setting: | Sample size:<br>Sampling strategy and rationalization:<br>Recruitment strategies:<br>Inclusion and exclusion criteria:<br>Description of intervention and comparator (when applicable):<br>Age:<br>Sex:<br>Race:<br>Socioeconomic status:<br>Diagnosis:<br>Disease severity: | Instruments used:<br>Mode of administration:<br>Direct or indirect measurement of HSUVs:<br>Self-reported or by a proxy (eg. prison staff or healthcare provider):<br>Follow-up duration: | HRQoL or HSUV value for the health states reported:<br>Are disaggregated values for HRQoL or HSUV measures present:<br>Response rates: Reasons for missing data:<br>Summary of findings:<br>Limitations of the study identified by authors of the study:<br>Limitations of the study identified by our research team: |
